# Supplementary material
Source: PubMed Central journal article supplement (PMC3589095)
Supplement: embor20134s2.pdf [file embor20134s2.pdf]

Manuscript EMBOR-2012-36392

**$\beta$ 1-adrenergic receptor antagonists signal via PDE4 translocation**

Wito Richter, Delphine Mika, Elise Blanchard, Peter Day and Marco Conti

*Corresponding author: Marco Conti, Univ. of California, San Francisco*

---

**Review timeline:**

Submission date:

16 July 2012

Accepted:

15 January 2013

---

**Transaction Report:**

No Peer Review Process File is available with this article, as the authors have chosen not to make the review process public in this case.
